# Supplementary material
Source: ML conference proceedings conference paper supplement (https://aclanthology.org/D19-1022)
Supplement: Attachment [file D19-1022.Attachment.pdf]

## A FramNet Frames Used for Relation Extraction on TACRED Dataset

| Relation Types                                                                                                        | FrameNet Frames                                                                                                                                                                                               |
|-----------------------------------------------------------------------------------------------------------------------|---------------------------------------------------------------------------------------------------------------------------------------------------------------------------------------------------------------|
| org:alternate_names,<br>per:alternate_names                                                                           | Being_named, Name_conferral, Namesake,<br>Referring_by_name, Simple_naming                                                                                                                                    |
| org:city_of_headquarters,<br>org:country_of_headquarters,<br>org:stateorprovince_of_headquarters                      | Being_located, Locale, Locale_by_characteristic_entity,<br>Locale_by_collocation, Locale_by_event,<br>Locale_by_ownership, Locale_by_use, Locale_closure,<br>Locating, Locative_relation, Spatial_co-location |
| org:founded, org:founded_by                                                                                           | Intentionally_create                                                                                                                                                                                          |
| org:dissolved                                                                                                         | Location_in_time, Relative_time, Time_vector,<br>Timespan, Temporal_collocation, Temporal_subregion                                                                                                           |
| org:member_of, org:members                                                                                            | Becoming_a_member, Membership                                                                                                                                                                                 |
| org:political/religious_affiliation,<br>per:religion                                                                  | People_by_religion, Religious_belief, Political_locales                                                                                                                                                       |
| org:subsidiaries, org:parents                                                                                         | Part_whole, Partitive, Inclusion                                                                                                                                                                              |
| org:shareholders                                                                                                      | Capital_stock                                                                                                                                                                                                 |
| org:top_members/employees,<br>org:number_of_employees/members,<br>per:employee_of                                     | Leadership, Working_a_post, Employing,<br>People_by_vocation, Cardinal_numbers                                                                                                                                |
| per:age                                                                                                               | Age                                                                                                                                                                                                           |
| per:cause_of_death, per:date_of_death,<br>per:city_of_death,<br>per:country_of_death,<br>per:stateorprovince_of_death | Death, Cause_harm                                                                                                                                                                                             |
| per:charges                                                                                                           | Notification_of_charges, Committing_crime,<br>Criminal_investigation                                                                                                                                          |
| per:children, per:parents,<br>per:other_family, per:siblings                                                          | Kinship                                                                                                                                                                                                       |
| per:cities_of_residence,<br>per:countries_of_residence,<br>per:stateorprovinces_of_residence                          | Expected_location_of_person, Residence                                                                                                                                                                        |
| per:date_of_birth, per:city_of_birth,<br>per:country_of_birth,<br>per:stateorprovince_of_birth                        | Being_born, Giving_birth                                                                                                                                                                                      |
| per:origin                                                                                                            | Origin, People_by_origin                                                                                                                                                                                      |
| per:schools_attended                                                                                                  | Education_teaching                                                                                                                                                                                            |
| per:spouse                                                                                                            | Personal_relationship, Forming_relationships                                                                                                                                                                  |
| per:title                                                                                                             | Performers_and_roles                                                                                                                                                                                          |

## B Hyper-parameter Settings and Training Details

The dimension of POS and position embeddings are both 30. The inner layer dimension in position-wise feed-forward network is 130. The dimension of the relative positional encoding within knowledge-attention and self-attention is 50. The attention dimension is 200 in position-aware attention and 100 in multi-channel attention. The fully connected network before softmax has a dimensionality of 100. We use ReLU for all the nonlinear activation functions. Dropout rate is 0.4 for input embeddings, attention outputs and position-wise feed-forward outputs, and 0.1 for attention weights dropout.

The models are trained using Stochastic Gradient Descent with learning rate of 0.1 and momentum of 0.9. The learning rate is decayed with a rate of 0.9 after 15 epochs if  $F_1$  score on dev set does not improve. The batch size is set to 100 and we train the model for 70 epochs.
